# Supplementary material
Source: PubMed Central journal article supplement (PMC434525)
Supplement: 1475-2875-3-15-S1.pdf [file 1475-2875-3-15-S1.pdf]

**Additional file.** Number of mosquito nets sold per camp and estimated maximum percentage coverage from subsidized sales.

| Camp                      | Year       |                  |    |            |                  |            |    |            |                    |            |    |            |                    |            |    |  |
|---------------------------|------------|------------------|----|------------|------------------|------------|----|------------|--------------------|------------|----|------------|--------------------|------------|----|--|
|                           | 2000       |                  |    | 2001       |                  |            |    | 2002       |                    |            |    | 2003       |                    |            |    |  |
|                           | Population | Number Sold      | %* | Population | Number Sold      | Total Sold | %* | Population | Number Sold        | Total Sold | %* | Population | Number Sold        | Total Sold | %* |  |
| Ashgharoo 1 2             |            |                  |    |            |                  |            |    | 10,859     | 375 <sup>3</sup>   | 375        | 10 | 10,859     | 1,144 <sup>3</sup> | 1,519      | 42 |  |
| Azakhil 1                 | 12,654     | 52 <sup>1</sup>  | 1  | 13,799     | 653 <sup>1</sup> | 705        | 15 | 14,467     | 1,445 <sup>1</sup> | 2,150      | 45 | 14,467     | 450 <sup>1</sup>   | 2,600      | 54 |  |
| Azakhil 2                 | 12,362     | 238 <sup>1</sup> | 6  | 17,208     | 751 <sup>1</sup> | 989        | 17 | 18,029     | 1,359 <sup>1</sup> | 2,348      | 39 | 18,029     | 451 <sup>1</sup>   | 2,799      | 47 |  |
| A.Warsak                  |            |                  |    |            |                  |            |    | 20,272     | 500 <sup>1</sup>   | 500        | 7  | 16,039     | 813 <sup>1</sup>   | 1,313      | 25 |  |
| Badaber                   | 11,000     | 56 <sup>1</sup>  | 2  | 10,000     | 319 <sup>1</sup> | 375        | 11 | 14,000     | 400 <sup>1</sup>   | 775        | 17 | 14,000     | 119 <sup>1</sup>   | 894        | 19 |  |
| Bagzai                    |            |                  |    | 13,000     | 900 <sup>1</sup> | 900        | 21 | 13,729     | 1,435 <sup>3</sup> | 2,335      | 51 | 13,170     | 595 <sup>3</sup>   | 2,930      | 67 |  |
| Basomera                  |            |                  |    |            |                  |            |    |            |                    |            |    | 11,485     | 500 <sup>1</sup>   | 500        | 13 |  |
| Basoo                     |            |                  |    |            |                  |            |    | 5,903      | 270 <sup>1</sup>   | 270        | 14 | 5,621      | 849 <sup>1</sup>   | 1,119      | 60 |  |
| Bhagicha                  | 9,059      | 409 <sup>1</sup> | 14 | 10,267     | 541 <sup>1</sup> | 950        | 28 | 10,740     | 562 <sup>1</sup>   | 1,512      | 42 | 9,998      | 688 <sup>1</sup>   | 2,200      | 66 |  |
| Bushera                   |            |                  |    |            |                  |            |    | 10,866     | 560 <sup>2</sup>   | 560        | 15 | 10,866     | 350 <sup>2</sup>   | 910        | 25 |  |
| Chapari                   |            |                  |    |            |                  |            |    | 6,146      | 573 <sup>2</sup>   | 573        | 28 | 6,146      | 481 <sup>2</sup>   | 1,054      | 51 |  |
| D.Dola                    | 15,307     | 29 <sup>1</sup>  | 1  | 16,206     | 124 <sup>1</sup> | 153        | 3  | 16,664     | 84 <sup>1</sup>    | 237        | 4  | 17,304     | 138 <sup>1</sup>   | 375        | 7  |  |
| Dallan                    | 10,990     | 318 <sup>1</sup> | 9  | 10,990     | 632 <sup>1</sup> | 950        | 26 | 11,698     | 750 <sup>1</sup>   | 1,700      | 44 | 11,343     | 900 <sup>1</sup>   | 2,600      | 69 |  |
| Dargamandi                |            |                  |    |            |                  |            |    |            |                    |            |    | 13,932     | 500 <sup>2</sup>   | 500        | 11 |  |
| Darpakhil                 |            |                  |    |            |                  |            |    |            |                    |            |    | 13,053     | 501 <sup>2</sup>   | 501        | 12 |  |
| Darsamand                 |            |                  |    | 18,285     | 799 <sup>1</sup> | 799        | 13 | 18,807     | 607 <sup>3</sup>   | 1,406      | 22 | 15,444     | 884 <sup>3</sup>   | 2,290      | 44 |  |
| Doaba                     |            |                  |    |            |                  |            |    |            |                    |            |    | 17,383     | 624 <sup>2</sup>   | 624        | 11 |  |
| Gambilla                  |            |                  |    |            |                  |            |    | 13,000     | 40 <sup>2</sup>    | 40         | 1  | 8,053      | 139 <sup>2</sup>   | 179        | 7  |  |
| Ghamkol 1                 | 16,259     | 38 <sup>1</sup>  | 1  | 16,259     | 159 <sup>1</sup> | 197        | 4  |            |                    |            |    |            |                    |            |    |  |
| Ghamkol 2                 | 15,360     | 39 <sup>1</sup>  | 1  | 15,360     | 161 <sup>1</sup> | 200        | 4  |            |                    |            |    |            |                    |            |    |  |
| Ichrian                   |            |                  |    |            |                  |            |    | 12,399     | 84 <sup>2</sup>    | 84         | 2  | 10,937     | 478 <sup>2</sup>   | 562        | 15 |  |
| Jalala                    |            |                  |    | 16,749     | 50 <sup>1</sup>  | 50         | 1  | 17,400     | 70 <sup>1</sup>    | 120        | 2  | 18,434     | 115 <sup>1</sup>   | 235        | 4  |  |
| Kahi                      |            |                  |    |            |                  |            |    | 11,705     | 1,022 <sup>2</sup> | 1,022      | 26 | 8,389      | 1,114 <sup>2</sup> | 2,136      | 76 |  |
| K. Chandna                | 28,580     | 400 <sup>1</sup> | 4  | 28,580     | 205 <sup>1</sup> | 605        | 6  | 28,580     | 278 <sup>1</sup>   | 883        | 9  | 28,580     | 707 <sup>1</sup>   | 1,590      | 17 |  |
| Kagan                     | 3,379      | 83 <sup>1</sup>  | 7  | 4,091      | 143 <sup>1</sup> | 226        | 17 | 4,271      | 148 <sup>1</sup>   | 374        | 26 | 3,268      | 197 <sup>1</sup>   | 571        | 52 |  |
| Katakana                  | 8,437      | 55 <sup>1</sup>  | 2  | 7,724      | 345 <sup>1</sup> | 400        | 16 | 8,046      | 206 <sup>1</sup>   | 606        | 23 | 9,732      | 82 <sup>1</sup>    | 688        | 21 |  |
| Kerala                    | 8,365      | 102 <sup>1</sup> | 4  | 8,861      | 51 <sup>1</sup>  | 153        | 5  | 9,331      | 146 <sup>1</sup>   | 299        | 10 | 9,583      | 132 <sup>1</sup>   | 431        | 13 |  |
| Kotki 2 (Hangu District)  | 5,781      | 250 <sup>1</sup> | 13 | 6,089      | 345 <sup>1</sup> | 595        | 29 | 6,328      | 452 <sup>1</sup>   | 1,047      | 50 | 5,260      | 499 <sup>1</sup>   | 1,546      | 88 |  |
| Kotki 2 (Bajaur District) |            |                  |    |            |                  |            |    |            |                    |            |    | 5,179      | 424 <sup>1</sup>   | 424        | 25 |  |
| Match Factory             |            |                  |    |            |                  |            |    |            |                    |            |    | 21,568     | 500 <sup>2</sup>   | 500        | 7  |  |
| M. Khoja                  |            |                  |    | 13,352     | 477 <sup>1</sup> | 477        | 11 | 13,826     | 1,066 <sup>3</sup> | 1,543      | 33 | 7,802      | 984 <sup>3</sup>   | 2,527      | 97 |  |
| M. Kot                    |            |                  |    |            |                  |            |    | 10,180     | 98 <sup>2</sup>    | 98         | 3  | 9,855      | 385 <sup>2</sup>   | 483        | 15 |  |
| Naguman                   |            |                  |    | 5,368      | 53 <sup>1</sup>  | 53         | 3  | 5,725      | 132 <sup>1</sup>   | 185        | 10 | 5,308      | 180 <sup>1</sup>   | 365        | 21 |  |
| Naryab                    | 5,543      | 255 <sup>1</sup> | 14 | 4,832      | 373 <sup>1</sup> | 628        | 39 | 4,832      | 389 <sup>1</sup>   | 1,017      | 63 | 4,832      | 409 <sup>1</sup>   | 1,426      | 89 |  |
| New Shamshatoo            |            |                  |    |            |                  |            |    |            |                    |            |    | 15,852     | 616 <sup>1</sup>   | 616        | 12 |  |
| Oblan                     | 10,000     | 29 <sup>1</sup>  | 1  | 15,841     | 121 <sup>1</sup> | 150        | 3  |            |                    |            |    |            |                    |            |    |  |
| Old Bagzai                |            |                  |    |            |                  |            |    | 4,289      | 210 <sup>3</sup>   | 210        | 15 | 2,641      | 418 <sup>3</sup>   | 628        | 71 |  |
| Satin                     |            |                  |    |            |                  |            |    | 13,454     | 475 <sup>2</sup>   | 475        | 11 | 13,454     | 750 <sup>2</sup>   | 1,225      | 27 |  |
| Shashu                    |            |                  |    |            |                  |            |    | 16,555     | 575 <sup>2</sup>   | 575        | 10 | 16,555     | 700 <sup>2</sup>   | 1,275      | 23 |  |
| Shapur                    |            |                  |    |            |                  |            |    |            |                    |            |    | 1555       | 146 <sup>1</sup>   | 146        | 28 |  |
| Thall 1                   | 11,087     | 109 <sup>1</sup> | 3  | 10,633     | 414 <sup>1</sup> | 523        | 15 | 10,906     | 500 <sup>1</sup>   | 1,023      | 28 | 7,594      | 614 <sup>1</sup>   | 1,637      | 65 |  |
| Thall 2                   |            |                  |    | 17,961     | 694 <sup>1</sup> | 694        | 12 | 17,208     | 498 <sup>1</sup>   | 1,192      | 21 | 16,789     | 579 <sup>1</sup>   | 1,771      | 32 |  |
| Timer                     |            |                  |    |            |                  |            |    |            |                    |            |    | 14,180     | 635 <sup>2</sup>   | 635        | 13 |  |
| Toor                      |            |                  |    | 10,625     | 329 <sup>1</sup> | 329        | 9  | 11,210     | 240 <sup>1</sup>   | 569        | 15 | 7,000      | 269 <sup>1</sup>   | 838        | 36 |  |

**Additional file (continued).** Number of mosquito nets sold per camp and estimated maximum percentage coverage from subsidized sales.

| Camp      | Year       |                  |    |            |                  |            |    |            |                    |            |    |            |                  |            |    |
|-----------|------------|------------------|----|------------|------------------|------------|----|------------|--------------------|------------|----|------------|------------------|------------|----|
|           | 2000       |                  |    | 2001       |                  |            |    | 2002       |                    |            |    | 2003       |                  |            |    |
|           | Population | Number Sold      | %* | Population | Number Sold      | Total Sold | %* | Population | Number Sold        | Total Sold | %* | Population | Number Sold      | Total Sold | %* |
| W. Khwara |            |                  |    | 10,622     | 240 <sup>1</sup> | 240        | 7  | 17,704     | 1,071 <sup>1</sup> | 1,311      | 22 | 21,255     | 447 <sup>1</sup> | 1,758      | 25 |
| Zarinoor  | 18,250     | 128 <sup>1</sup> | 2  | 20,566     | 790 <sup>1</sup> | 918        | 13 | 21,132     | 682 <sup>1</sup>   | 1,600      | 23 | 16,714     | 500 <sup>1</sup> | 2,100      | 38 |
| Zangali   |            |                  |    |            |                  |            |    | 9,719      | 3 <sup>2</sup>     | 3          | 0  | 9,719      | 201 <sup>2</sup> | 204        | 6  |
| Total     | 202,413    | 2,590            | 4  | 323,268    | 9,669            | 12,259     | 11 | 439,980    | 17,305             | 29,017     | 20 | 519,227    | 21,642           | 51,224     | 30 |

<sup>1,2,3</sup> Type of intervention: 1 = malaria, 2 = ACL, 3 = malaria & ACL

\* Percentages were calculated on the assumption that one ITN covers three people
